# Supplementary material for: Do-it-yourself simulators and building a culture of practice in the virtual era
Source: PubMed Central journal article supplement — JTCVS Tech. 2021 May 19;8:100–11. doi: 10.1016/j.xjtc.2021.05.012 (PMC8350878; doi:10.1016/j.xjtc.2021.05.012), 2021-05-19
Supplement: mmc2.pdf [file mmc2.pdf]

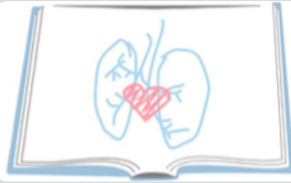

THORACIC SURGERY  
RESIDENTS ASSOCIATION

## Achieving Technical Proficiency in Cardiothoracic Surgery Training

The following questions are in reference to practicing technical skills outside of the operating room setting

Practice is important to my growth as a trainee.

- Strongly agree
- Agree
- Neither agree nor disagree
- Disagree
- Strongly disagree

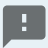

Practice has enhanced my  
intraoperative performance.

- Strongly agree
- Agree
- Neither agree nor disagree
- Disagree
- Strongly disagree

Practice has enhanced my  
intraoperative autonomy.

- Strongly agree
- Agree
- Neither agree nor disagree
- Disagree
- Strongly disagree

I feel I am technically advanced for my level of training.

- Strongly agree
- Agree
- Neutral
- Disagree
- Strongly disagree

Practicing alone is just as effective as practicing in a group simulation session.

- Strongly agree
- Agree
- Neither agree nor disagree
- Disagree
- Strongly disagree

Prior to each case, I have a clear understanding of which technical parts I will be expected to perform.

- Strongly agree
- Agree
- Neutral
- Disagree
- Strongly disagree

Following each case, I receive clear feedback on specific areas of improvement and how to improve in those areas.

- Strongly agree
- Agree
- Neither agree nor disagree
- Disagree
- Strongly disagree

The degree of operative autonomy I have correlates with the degree that I have prepared technically for the case.

- Strongly agree
- Agree
- Neutral
- Disagree
- Strongly disagree

My seniors and attending surgeons encourage me to practice.

- Strongly agree
- Agree
- Neutral
- Disagree
- Strongly disagree

My program's didactic sessions are instructional on what and how to practice.

- Strongly agree
- Agree
- Neither agree nor disagree
- Disagree
- Strongly disagree

I have the necessary resources to practice technical skills outside of the operating room.

- Strongly agree
- Agree
- Neither agree nor disagree
- Disagree
- Strongly disagree

I believe that I practice more than my peers.

- Strongly agree
- Agree
- Neither agree nor disagree
- Disagree
- Strongly disagree

How many hours a week do you practice?

- 0-1
- 1-2
- 2-3
- 3-4
- 4-5
- 5-6
- 6-7
- >7

Where do you practice the most?

- Home
- Hospital (simulation center)
- Hospital (outside simulation center)

What is the biggest impediment to practice? (Please Rank: 1 is biggest and 5 is smallest )

|             | 1                     | 2                     | 3                     | 4                     |
|-------------|-----------------------|-----------------------|-----------------------|-----------------------|
| Time        | <input type="radio"/> | <input type="radio"/> | <input type="radio"/> | <input type="radio"/> |
| Motivation  | <input type="radio"/> | <input type="radio"/> | <input type="radio"/> | <input type="radio"/> |
| Equipment   | <input type="radio"/> | <input type="radio"/> | <input type="radio"/> | <input type="radio"/> |
| Space       | <input type="radio"/> | <input type="radio"/> | <input type="radio"/> | <input type="radio"/> |
| Instruction | <input type="radio"/> | <input type="radio"/> | <input type="radio"/> | <input type="radio"/> |



Please enter email address to be included in prize drawing.

Your answer

---

Submit

Never submit passwords through Google Forms.

This content is neither created nor endorsed by Google.  
[Report Abuse](#) - [Terms of Service](#) - [Privacy Policy](#)

Google Forms
